# Supplementary material for: Hierarchical FeCo LDH/NiSe heterostructure electrocatalysts with rich heterointerfaces for robust water splitting at an industrial-level current density
Source: Royal Society of Chemistry journal article supplement (doi:10.1039/d4qi02426e), 2024-11-06
Supplement: d4qi02426e1.pdf [file d4qi02426e1.pdf]

**Electronic Supplementary Material**

**Hierarchical FeCo LDH/NiSe heterostructure  
electrocatalysts with rich heterointerfaces for robust water  
splitting at industrial-level current density**

*Weiwei Han,<sup>†,‡</sup> Wenyi Wang,<sup>†</sup> Jiahong Liao,<sup>†</sup> Yi He,<sup>†,‡</sup> Xingwang Zhang,<sup>\*,†</sup> Chunlin Yu<sup>\*,†,‡</sup>*

*<sup>†</sup> Institute of Zhejiang University-Quzhou, Quzhou 324000, China*

*<sup>‡</sup> College of Chemical and Biological Engineering, Zhejiang University, Hangzhou 310027, China*

**\*Corresponding authors**

E-mail: xwzhang@zju.edu.cn (Xingwang Zhang), chunlinyu@zju.edu.cn (Chunlin Yu)

## Supplementary Experimental Details

1. Electrochemical active surface area (ECSA) calculation: The ECSA can be estimated from the double layer capacitances ( $C_{dl}$ ) by the equation.

$$ECSA = \frac{C_{dl}}{C_s} \times A \quad (1)$$

Where the  $C_s$  of  $40 \mu\text{F cm}^{-2}$  is the specific capacitance for the flat surface, and  $A$  is the geometric surface area of the electrode ( $0.4 \text{ cm}^2$ ).

2. Faradaic efficiency (FE) calculation: The FE was calculated by comparing the actual amount of  $\text{O}_2$  production with the theoretical amount of  $\text{O}_2$ .

$$FE\% = \frac{4 \times 96485 \times n}{I \times t} \times 100\% \quad (2)$$

In the equation,  $n$  (mol) is the amount of  $\text{O}_2$  measured from the corresponding volume,  $I$  is the current (A),  $t$  is the measured time (s).

3. Mass activity (MA) calculation: The MA ( $\text{A g}^{-1}$ ) of catalysts was calculated by the following equation :

$$MA = \frac{j}{m} \quad (4)$$

Where  $j$  is the measured current density,  $m$  is the catalyst loading.

4. Computational methods

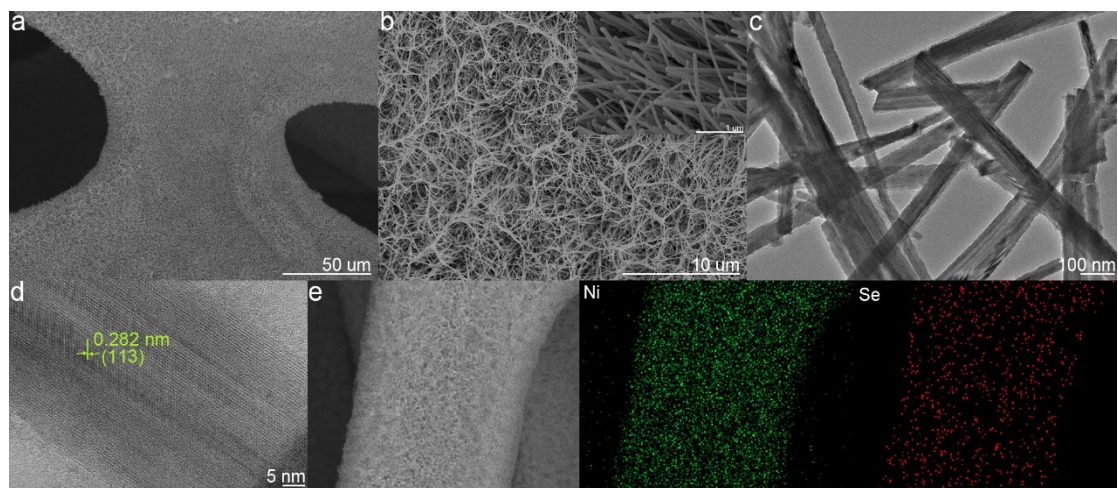

**Figure S1.** (a) Low- and (b) high-magnification SEM images, (c, d) TEM and HRTEM images, and (e) corresponding EDS elemental mapping images of NiSe@NF.

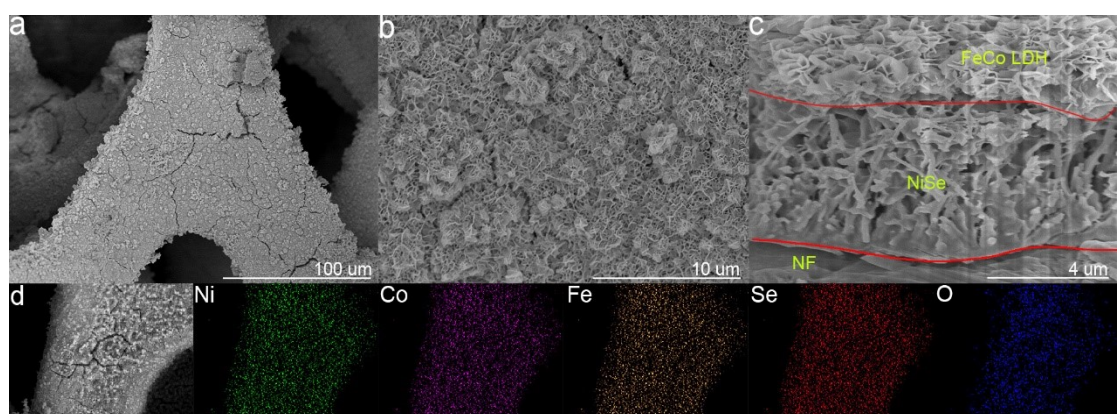

**Figure S2.** (a) Low- and (b, c) high-magnification SEM images, and (d) EDS elemental mapping images of FeCo LDH/NiSe@NF.

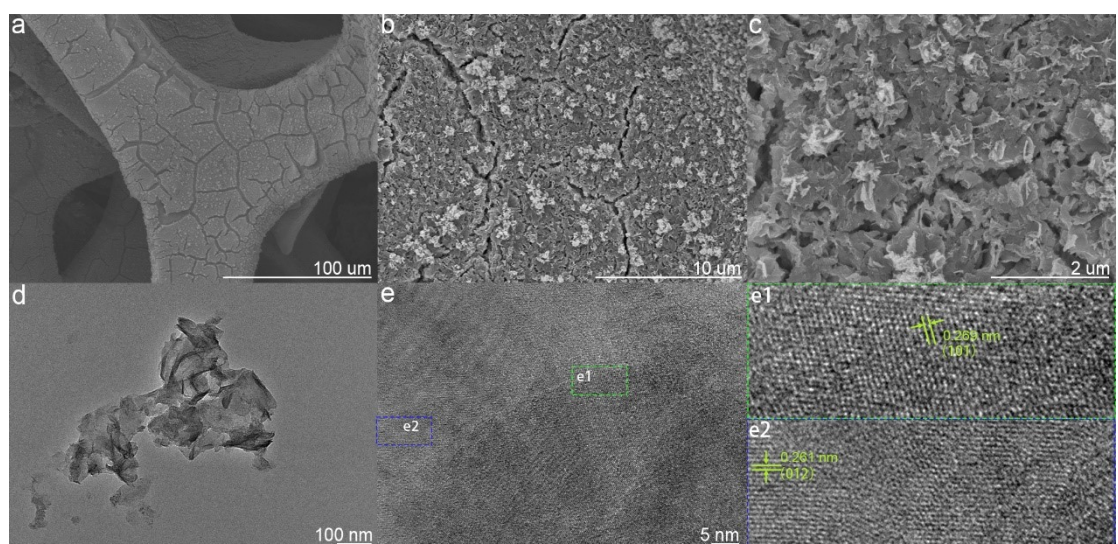

**Figure S3.** (a) Low- and (b, c) high-magnification SEM images, (d) TEM image, and (e) HRTEM images and (e1, e2) the lattice fringe images of the squared part of FeCo LDH@NF.

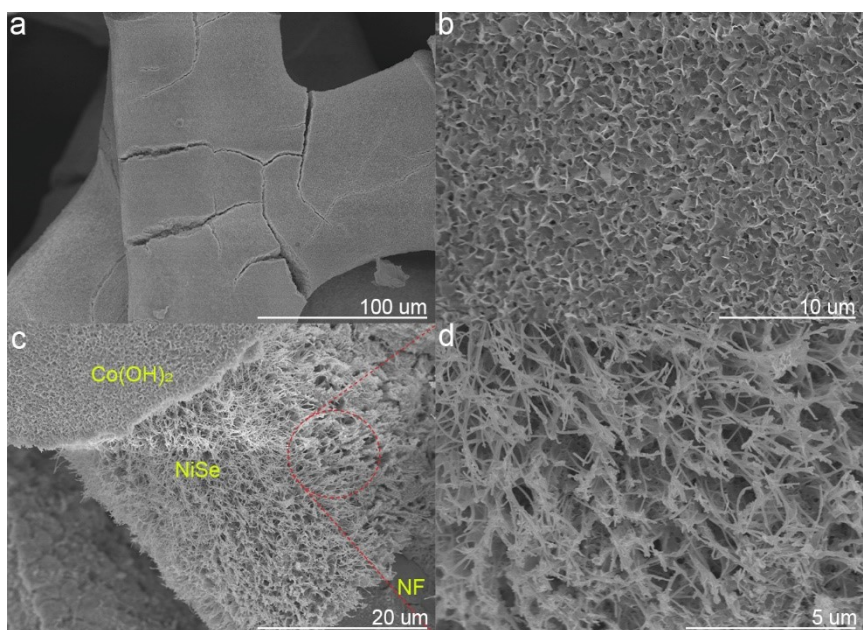

**Figure S4.** (a) Low- and (b-d) high-magnification SEM images of  $\text{Co(OH)}_2/\text{NiSe}@\text{NF}$ .

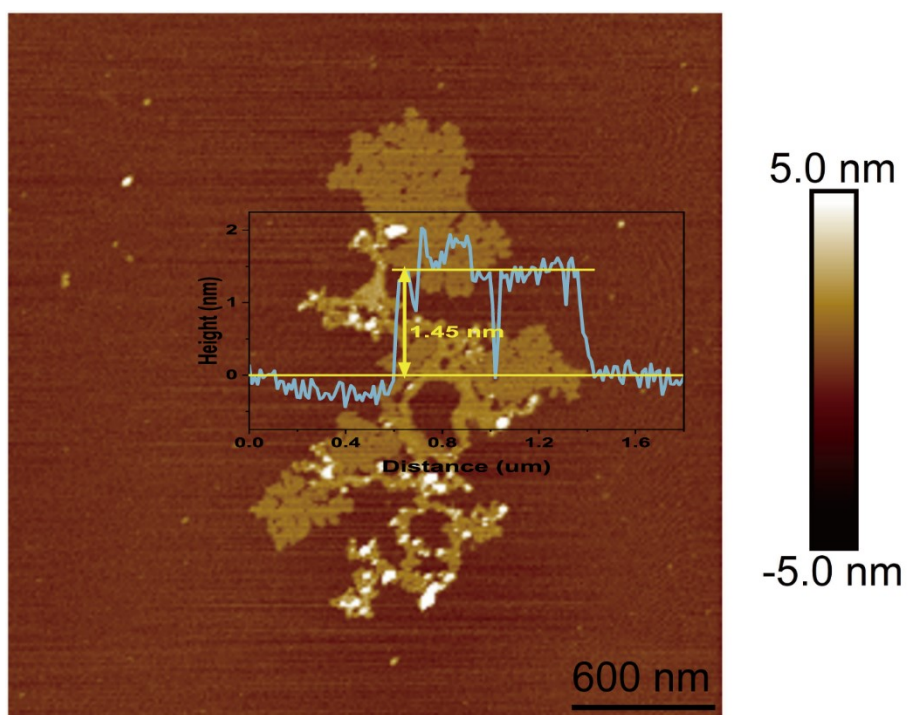

**Figure S5.** The AFM image and the corresponding AFM height profile (inset) of FeCo LDH.

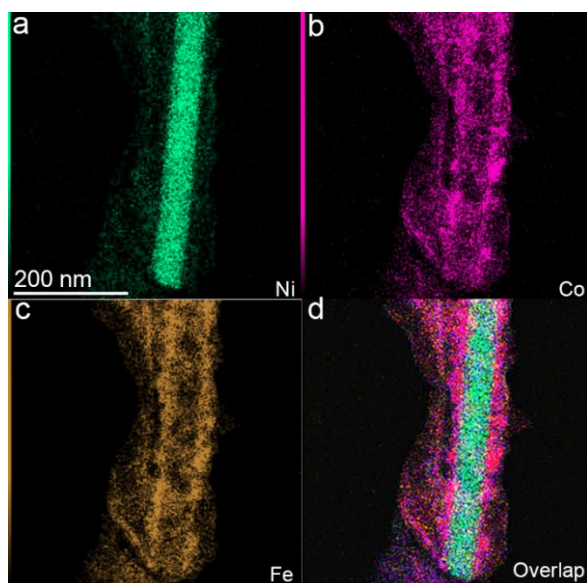

**Figure S6.** EDS mapping images of FeCo LDH/NiSe@NF: (a) Ni, (b) Co, (c) Fe, and (d) Ni + Co + Fe overlap.

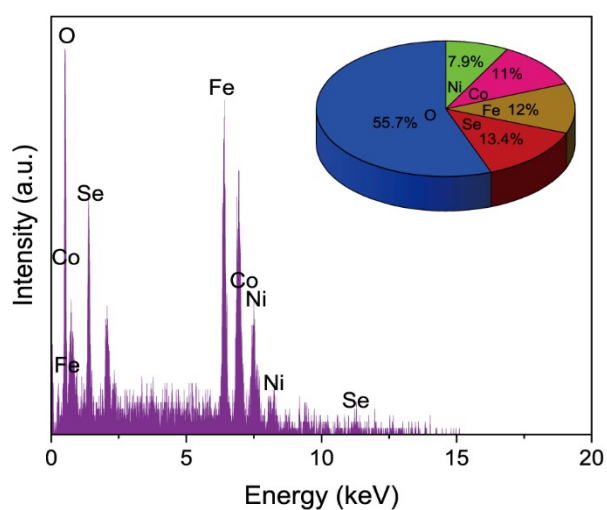

**Figure S7.** EDS profile of FeCo LDH/NiSe@NF.

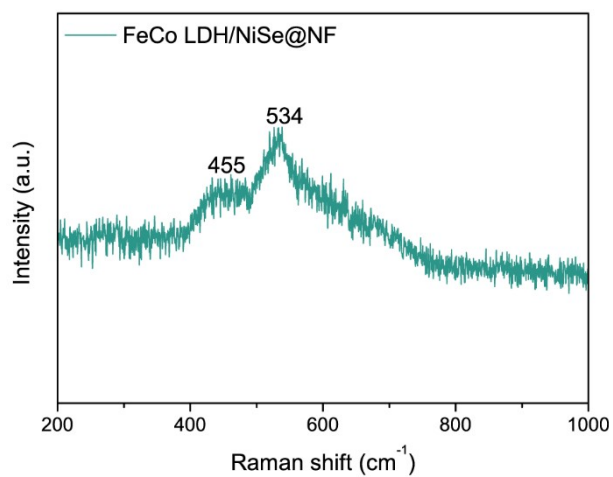

**Figure S8.** Raman spectrum of FeCo LDH/NiSe@NF.

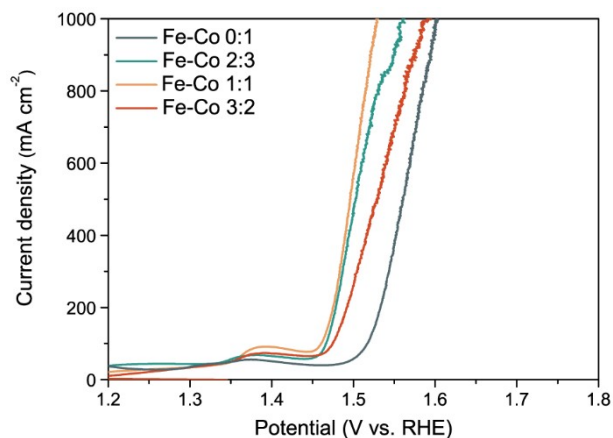

**Figure S9.** The LSV polarization curves of FeCo LDH/NiSe@NF with different molar ratios of pristine  $\text{FeSO}_4 \cdot 7\text{H}_2\text{O}$  and  $\text{Co}(\text{NO}_3)_2 \cdot 6\text{H}_2\text{O}$ .

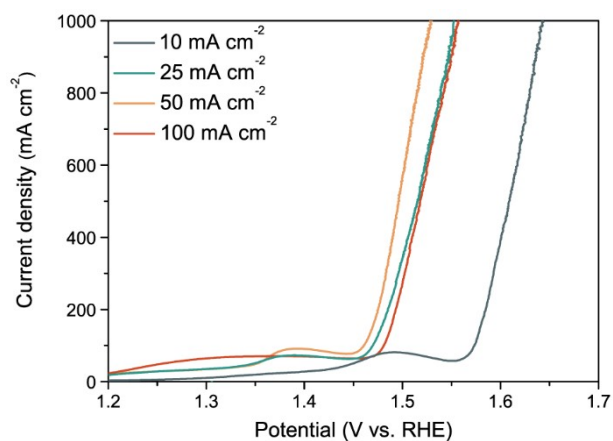

**Figure S10.** The LSV polarization curves of FeCo LDH/NiSe@NF obtained under different electrodeposition current densities.

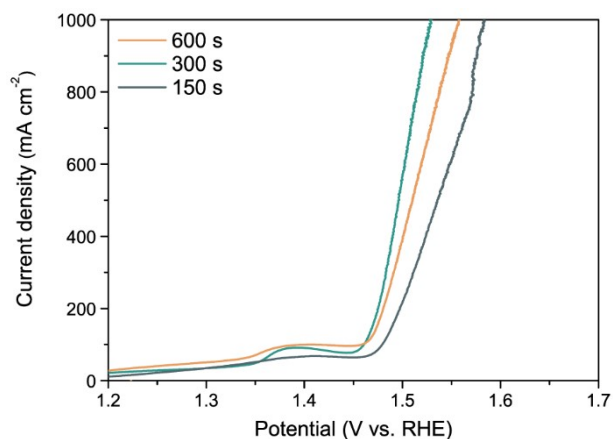

**Figure S11.** The LSV polarization curves of FeCo LDH/NiSe@NF obtained under different electrodeposition time.

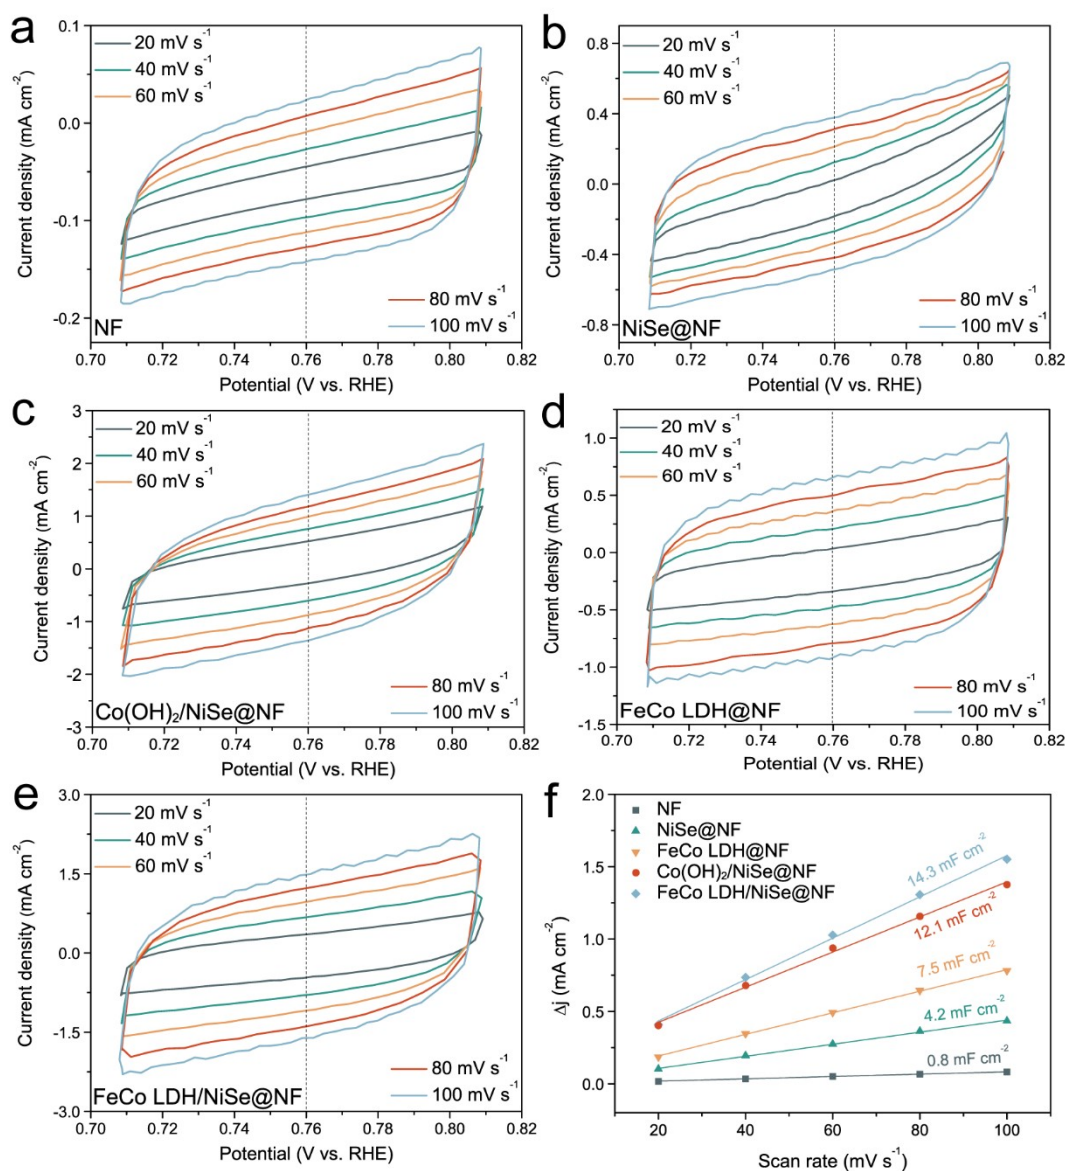

**Figure S12.** CV curves of (a) NF, (b) NiSe@NF, (c)  $\text{Co(OH)}_2/\text{NiSe@NF}$ , (d) FeCo LDH@NF, and (e) FeCo LDH/NiSe@NF at different scan rates from 20 to 100  $\text{mV s}^{-1}$ . (f) Corresponding  $C_{dl}$  plots of the above samples.

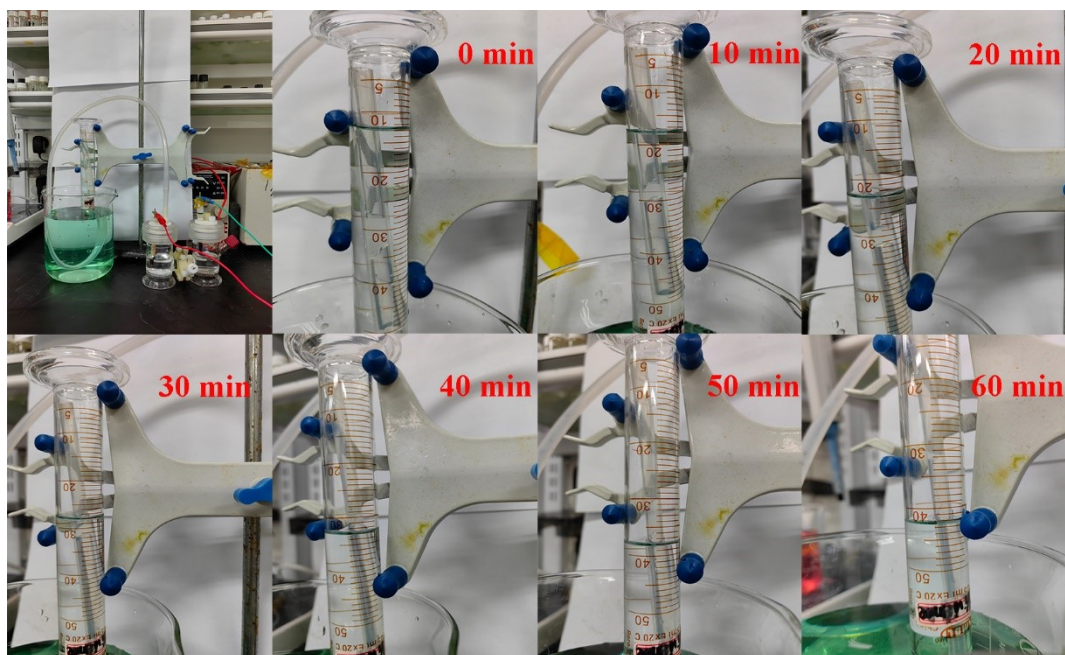

**Figure S13.** Optical photos of O<sub>2</sub> collection set-up and O<sub>2</sub> volume readings taken every ten minutes for Faradic efficiency measurement.

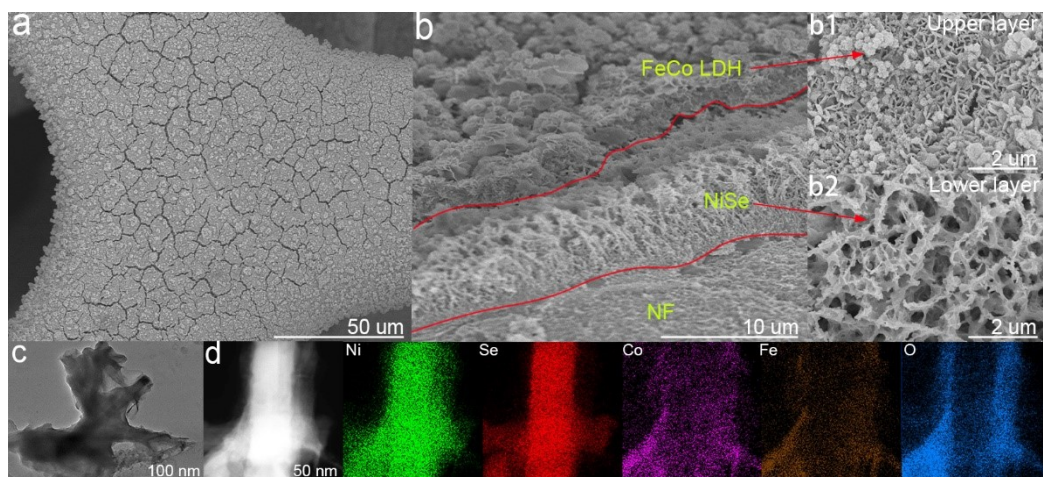

**Figure S14.** (a) Low- and (b) high-magnification SEM images, (c) TEM image, (d) HAADF-STEM and corresponding elemental mapping images of FeCo LDH/NiSe@NF after OER stability test.



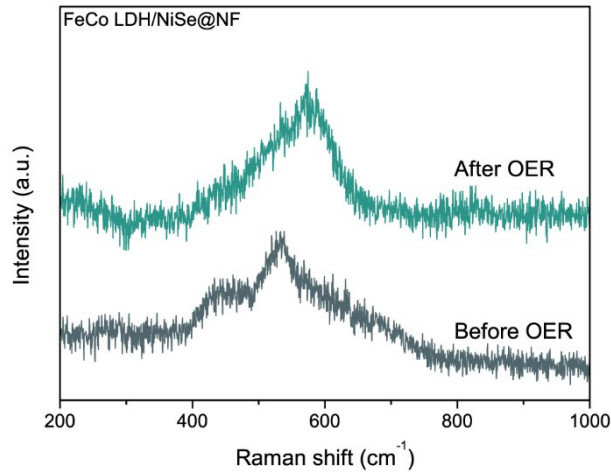

**Figure S15.** Raman spectra of FeCo LDH/NiSe@NF before and after OER stability test.

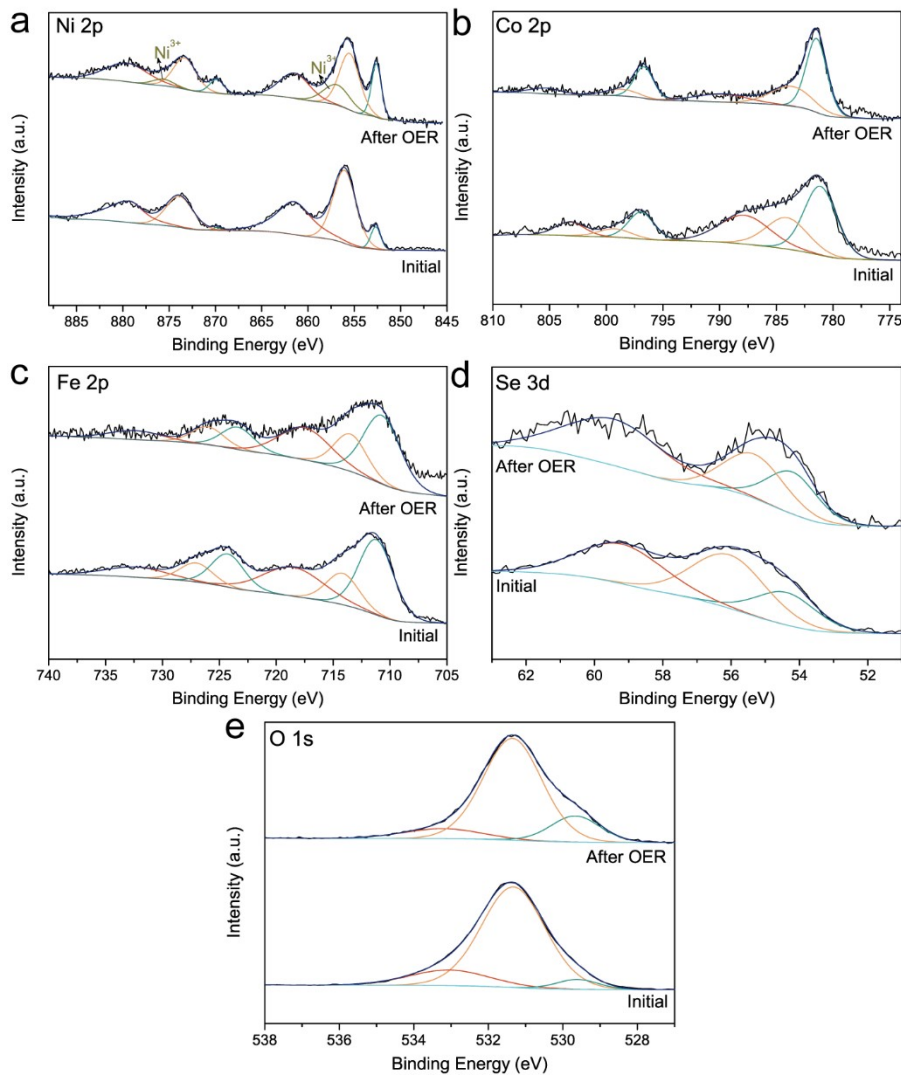

**Figure S16.** High-resolution XPS spectra of (a) Ni 2p, (b) Co 2p, (c) Fe 2p, (d) Se 3d, and (e) O 1s for FeCo LDH/NiSe@NF before and after OER stability test.

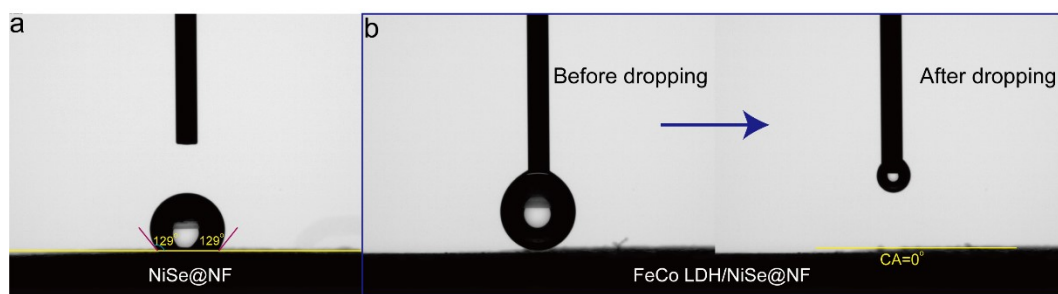

**Figure S17.** Contact angles of (a) NiSe@NF and (b) FeCo LDH/NiSe@NF.

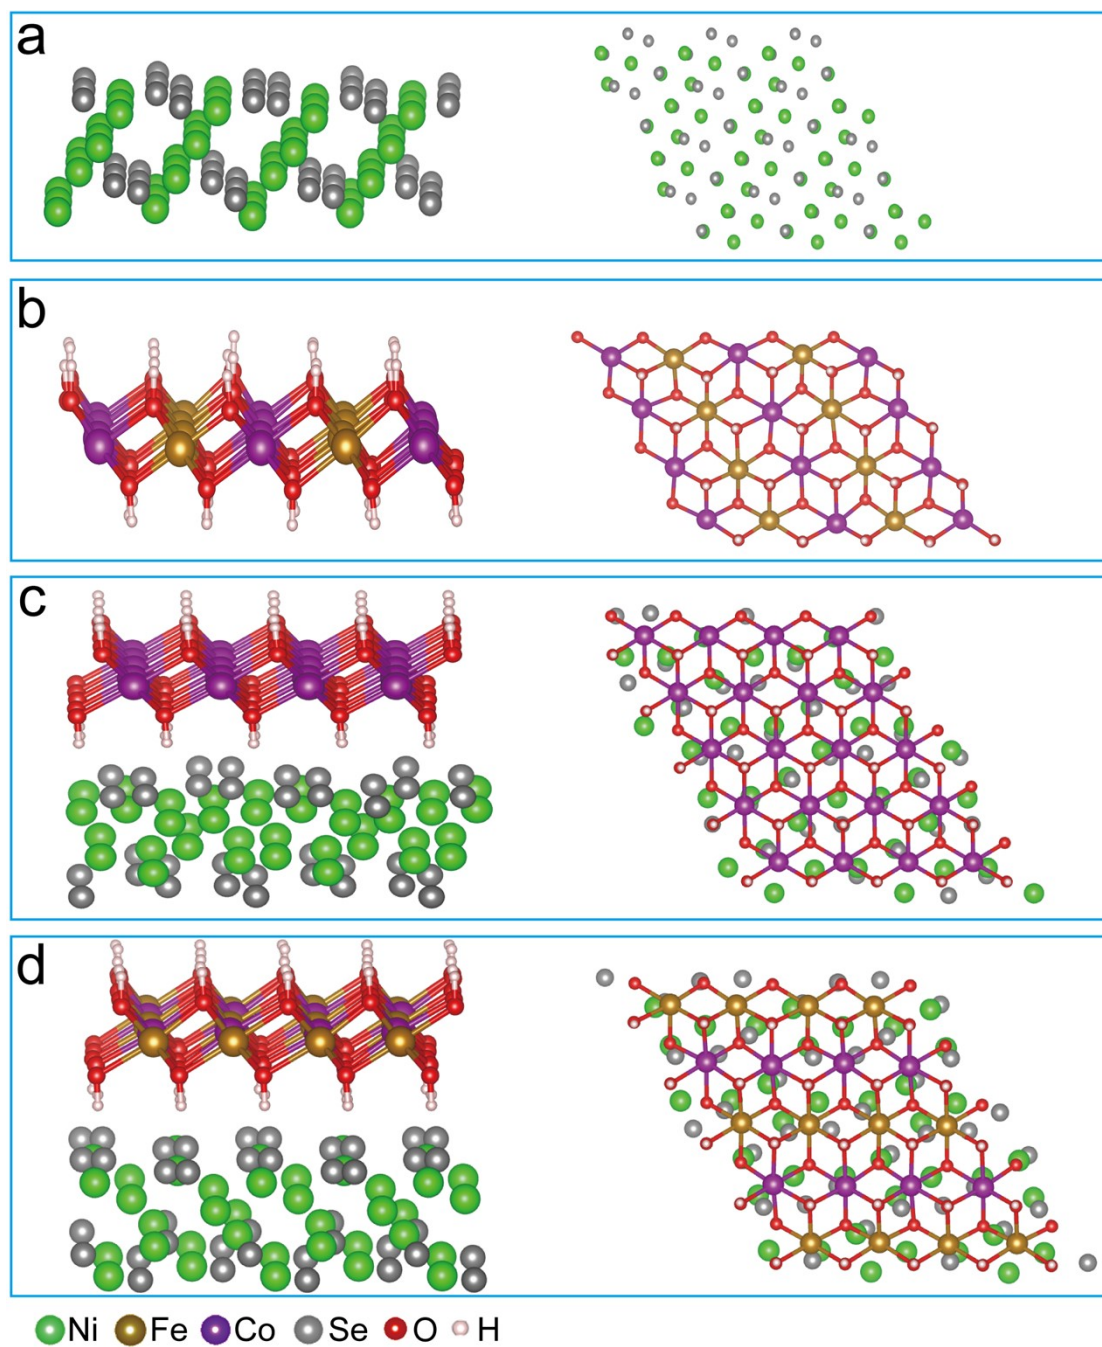

**Figure S18.** Structure models of (a) NiSe, (b) FeCo LDH, (c) Co(OH)<sub>2</sub>/NiSe, and (d) FeCo LDH/NiSe.

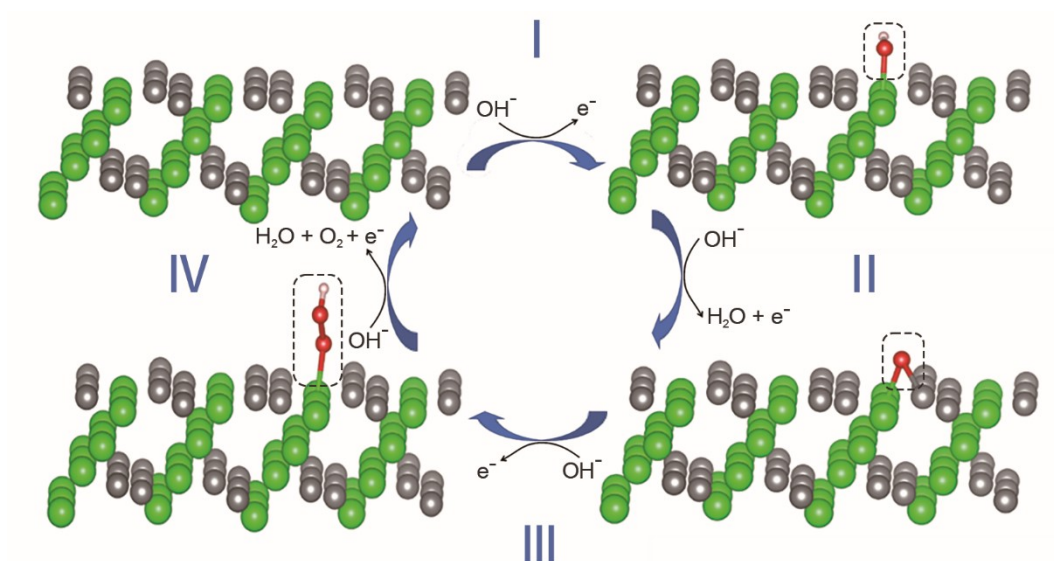

**Figure S19.** Four electrons reaction process over optimized structure models with oxygen intermediates (\*OH, \*O, and \*OOH) adsorbed on the surface active sites of NiSe for alkaline OER.

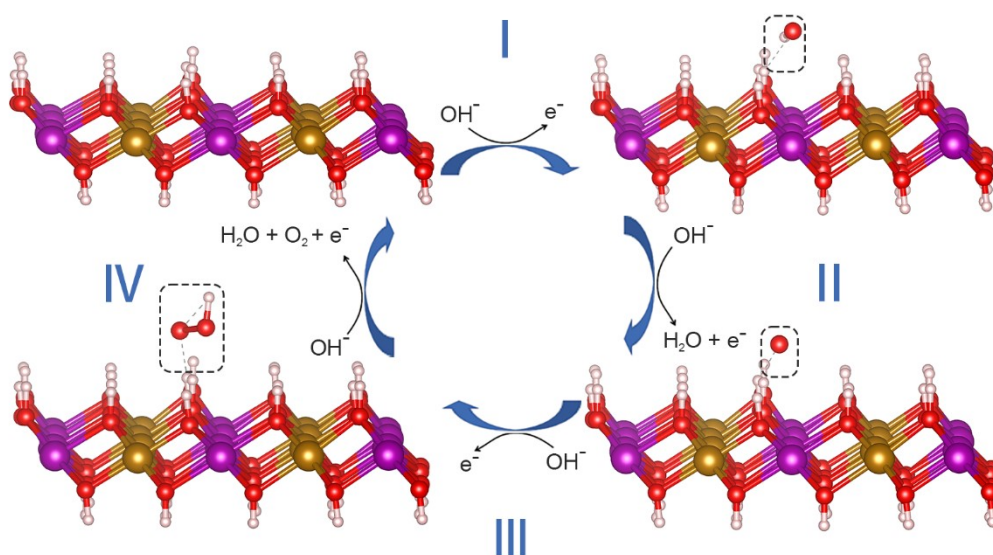

**Figure S20.** Four electrons reaction process over optimized structure models with oxygen intermediates (\*OH, \*O, and \*OOH) adsorbed on the surface active sites of FeCo LDH for alkaline OER.

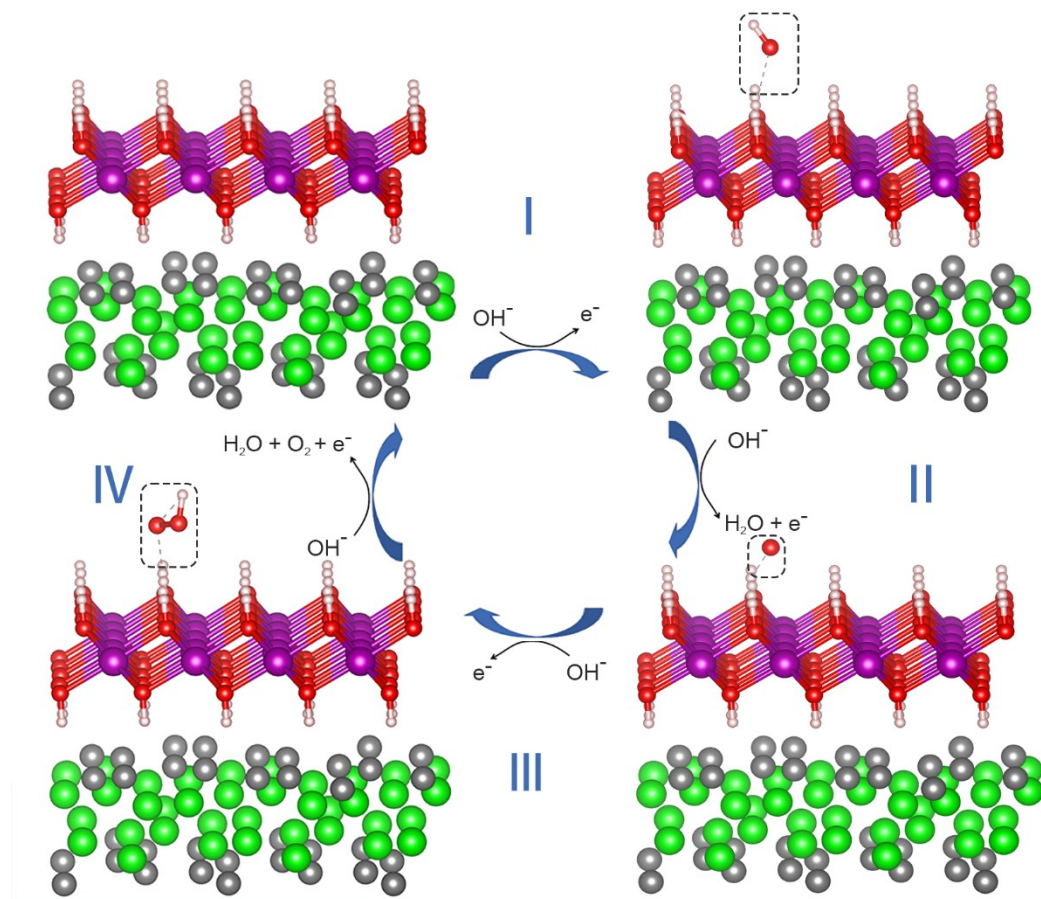

**Figure S21.** Four electrons reaction process over optimized structure models with oxygen intermediates (\*OH, \*O, and \*OOH) adsorbed on the surface active sites of Co(OH)<sub>2</sub>/NiSe for alkaline OER.

**Table S1.** The elemental molar content (at%) of different catalysts determined by EDS.

| Elements | NiSe@NF | FeCo LDH/NiSe@NF | FeCo LDH/NiSe@NF (post-OER) |
|----------|---------|------------------|-----------------------------|
| Ni       | 42.40   | 7.90             | 8.17                        |
| Co       | –       | 11.03            | 13.95                       |
| Fe       | –       | 11.95            | 15.61                       |
| Se       | 57.60   | 13.41            | 8.27                        |
| O        | –       | 55.71            | 54.00                       |

**Table S2.** Comparison of the OER performance of the FeCo LDH/NiSe@NF with other recently reported electrocatalysts in 1.0 M KOH.

| Catalyst                                                                            | Substrate          | $\eta_{100}$<br>(mV) | $\eta_{500}$<br>(mV) | $\eta_{1000}$<br>(mV) | Stability                          | Reference        |
|-------------------------------------------------------------------------------------|--------------------|----------------------|----------------------|-----------------------|------------------------------------|------------------|
| <b>FeCo LDH/NiSe</b>                                                                | <b>Nickel foam</b> | <b>230</b>           | <b>266</b>           | <b>298</b>            | <b><math>t_{1000}=100</math> h</b> | <b>This work</b> |
| Cu@NiFe LDH                                                                         | Cu foam            | 281                  | 311                  | 315                   | $t_{100}=48$ h                     | [1]              |
| (Ni,Fe)OOH                                                                          | Nickel foam        | –                    | 259                  | 289                   | $t_{1000}=48$ h                    | [2]              |
| NiFe LDH/NiS                                                                        | Nickel foam        | 277                  | –                    | 325                   | $t_{400}=100$ h                    | [3]              |
| R-NiFeO <sub>x</sub> H <sub>y</sub>                                                 | Nickel foam        | 266                  | 302                  | 313                   | $t_{500}=500$ h                    | [4]              |
| Fe <sub>2</sub> O <sub>3</sub> @Ni <sub>2</sub> P/Ni(PO <sub>3</sub> ) <sub>2</sub> | Nickel foam        | 300                  | 340                  | 370                   | $t_{1000}=8$ h                     | [5]              |
| FeP/Ni <sub>2</sub> P                                                               | Nickel foam        | –                    | 280                  | 293                   | $t_{100}=25$ h                     | [6]              |
| S-doped FeOOH                                                                       | Iron foam          | ~290                 | 324                  | 358                   | $t_{1000}=1000$ h                  | [7]              |
| FeOOH-CoS/NF                                                                        | Nickel foam        | ~260                 | 306                  | 329                   | $t_{500}=50$ h                     | [8]              |
| Zn-Fe <sub>x</sub> Ni <sub>(1-x)</sub> OOH                                          | Nickel foam        | 269                  | 310                  | 330                   | $t_{1000}=1000$ h                  | [9]              |
| MnCo/NiSe                                                                           | Nickel foam        | –                    | 340.4                | 370.7                 | $t_{500}=200$ h                    | [10]             |
| CoNi-LDH/Fe MOF                                                                     | Nickel foam        | 235                  | 275                  | 305                   | $t_{500}=40$ h                     | [11]             |
| Ni/MoO <sub>2</sub> @CN                                                             | Nickel foam        | ~310                 | ~380                 | 420                   | $t_{1000}=200$ h                   | [12]             |
| NiCo@C-NiCoMoO                                                                      | Nickel foam        | –                    | 370                  | 390                   | $t_{1000}=340$ h                   | [13]             |
| Fe MOF-Ni <sub>3</sub> S <sub>2</sub>                                               | Nickel foam        | 243                  | 283                  | 309                   | $t_{500}=20$ h                     | [14]             |
| Mn <sub>0.15</sub> -NiFe LDH/Fe <sub>0.64</sub> Ni <sub>0.36</sub>                  | Nickel mesh        | 242                  | 295                  | 345                   | $t_{500}=250$ h                    | [15]             |
| Ru <sub>1</sub> SACs@FeCo-LDH                                                       | Nickel foam        | –                    | 230                  | 246                   | $t_{1000}=1200$ h                  | [16]             |
| Ni <sub>2</sub> P-Fe <sub>2</sub> P                                                 | Nickel foam        | 261                  | ~310                 | 337                   | $t_{500}=48$ h                     | [17]             |
| FeNiOOH(Se)/IF                                                                      | Iron foam          | 279                  | 348                  | –                     | $t_{100}=100$ h                    | [18]             |

Note: The summarized stability tests were performed at 100, 500 or 1000 mA cm<sup>-2</sup>.

**Table S3.** Comparison of the overall water splitting performance for the NiCoP/NiCoS<sub>x</sub>@NF||FeCo LDH/NiSe@NF with other reported electrocatalysts in 1.0 M KOH.

| Electrode                                                                                                              | Cell voltage (V)<br>@100 mA cm <sup>-2</sup> | Stability (h)                     | Reference        |
|------------------------------------------------------------------------------------------------------------------------|----------------------------------------------|-----------------------------------|------------------|
| <b>NiCoP/NiCoS<sub>x</sub>@NF  FeCo LDH/NiSe@NF</b>                                                                    | <b>1.718</b>                                 | <b>200@500 mA cm<sup>-2</sup></b> | <b>This work</b> |
| Fe <sub>2</sub> O <sub>3</sub> @Ni <sub>2</sub> P/Ni(PO <sub>3</sub> ) <sub>2</sub> /NF                                | 1.93                                         | 10@3.0 V                          | [19]             |
| Mo-Ni <sub>3</sub> S <sub>2</sub> /Ni <sub>x</sub> P <sub>y</sub>                                                      | ~1.79                                        | 72@1.85 V                         | [20]             |
| NiCoP@Co <sub>0.5</sub> Ni <sub>0.5</sub> Se <sub>2</sub> /NF  NiFe-LDH/NF                                             | 1.75                                         | 100@500 mA cm <sup>-2</sup>       | [21]             |
| Fe <sub>7.4%</sub> -NiSe                                                                                               | 1.74                                         | 27@1.634 V                        | [22]             |
| CoP NFs                                                                                                                | ~1.91                                        | 30@1.7 V                          | [23]             |
| Cr <sub>0.05</sub> Ni <sub>0.95</sub> Se <sub>2</sub> /CC                                                              | ~1.89                                        | 24@10 mA cm <sup>-2</sup>         | [24]             |
| MnCoP/NF                                                                                                               | 1.97                                         | 240@100 mA cm <sup>-2</sup>       | [25]             |
| Mn-doped Ni <sub>2</sub> O <sub>3</sub> /Ni <sub>2</sub> P//Mn-doped Ni <sub>x</sub> S <sub>y</sub> /Ni <sub>2</sub> P | ~1.73                                        | 120@50 mA cm <sup>-2</sup>        | [26]             |
| CoMoS <sub>x</sub> /NF                                                                                                 | 1.74                                         | 100@500 mA cm <sup>-2</sup>       | [27]             |

**Table S4.** Bader charge analysis of NiSe.

| Element | Atom number | Quantity of charge<br>(e) | Change of charges<br>(e) |
|---------|-------------|---------------------------|--------------------------|
| Ni      | 1           | 9.7505                    | -0.2495                  |
| Ni      | 2           | 9.7503                    | -0.2497                  |
| Ni      | 3           | 9.6226                    | -0.3774                  |
| Ni      | 4           | 9.6225                    | -0.3775                  |
| Ni      | 5           | 9.6887                    | -0.3113                  |
| Ni      | 6           | 9.6881                    | -0.3119                  |
| Ni      | 7           | 9.6867                    | -0.3133                  |
| Ni      | 8           | 9.6862                    | -0.3138                  |
| Ni      | 9           | 9.7507                    | -0.2493                  |
| Ni      | 10          | 9.7493                    | -0.2507                  |
| Ni      | 11          | 9.6229                    | -0.3771                  |
| Ni      | 12          | 9.6224                    | -0.3776                  |
| Ni      | 13          | 9.6883                    | -0.3117                  |
| Ni      | 14          | 9.6884                    | -0.3116                  |
| Ni      | 15          | 9.6863                    | -0.3137                  |
| Ni      | 16          | 9.686                     | -0.314                   |

|    |    |        |         |
|----|----|--------|---------|
| Ni | 17 | 9.7495 | -0.2505 |
| Ni | 18 | 9.7496 | -0.2504 |
| Ni | 19 | 9.6227 | -0.3773 |
| Ni | 20 | 9.6224 | -0.3776 |
| Ni | 21 | 9.6886 | -0.3114 |
| Ni | 22 | 9.6889 | -0.3111 |
| Ni | 23 | 9.6862 | -0.3138 |
| Ni | 24 | 9.6863 | -0.3137 |
| Ni | 25 | 9.7502 | -0.2498 |
| Ni | 26 | 9.7498 | -0.2502 |
| Ni | 27 | 9.6227 | -0.3773 |
| Ni | 28 | 9.6226 | -0.3774 |
| Ni | 29 | 9.6885 | -0.3115 |
| Ni | 30 | 9.6892 | -0.3108 |
| Ni | 31 | 9.6868 | -0.3132 |
| Ni | 32 | 9.6864 | -0.3136 |
| Ni | 33 | 9.7497 | -0.2503 |
| Ni | 34 | 9.7497 | -0.2503 |
| Ni | 35 | 9.6222 | -0.3778 |
| Ni | 36 | 9.6227 | -0.3773 |
| Ni | 37 | 9.6886 | -0.3114 |
| Ni | 38 | 9.6887 | -0.3113 |
| Ni | 39 | 9.6868 | -0.3132 |
| Ni | 40 | 9.6864 | -0.3136 |
| Ni | 41 | 9.7496 | -0.2504 |
| Ni | 42 | 9.7502 | -0.2498 |
| Ni | 43 | 9.6225 | -0.3775 |
| Ni | 44 | 9.6223 | -0.3777 |
| Ni | 45 | 9.6884 | -0.3116 |
| Ni | 46 | 9.6883 | -0.3117 |
| Ni | 47 | 9.6863 | -0.3137 |
| Ni | 48 | 9.686  | -0.314  |
| Se | 49 | 6.3147 | 0.3147  |
| Se | 50 | 6.3145 | 0.3145  |
| Se | 51 | 6.2947 | 0.2947  |
| Se | 52 | 6.2949 | 0.2949  |
| Se | 53 | 6.3669 | 0.3669  |
| Se | 54 | 6.3666 | 0.3666  |
| Se | 55 | 6.2758 | 0.2758  |
| Se | 56 | 6.2761 | 0.2761  |
| Se | 57 | 6.3144 | 0.3144  |
| Se | 58 | 6.3155 | 0.3155  |
| Se | 59 | 6.2947 | 0.2947  |
| Se | 60 | 6.2948 | 0.2948  |
| Se | 61 | 6.3674 | 0.3674  |
| Se | 62 | 6.3679 | 0.3679  |
| Se | 63 | 6.2756 | 0.2756  |
| Se | 64 | 6.2764 | 0.2764  |
| Se | 65 | 6.3145 | 0.3145  |

|    |    |        |        |
|----|----|--------|--------|
| Se | 66 | 6.3151 | 0.3151 |
| Se | 67 | 6.295  | 0.295  |
| Se | 68 | 6.2954 | 0.2954 |
| Se | 69 | 6.3671 | 0.3671 |
| Se | 70 | 6.3672 | 0.3672 |
| Se | 71 | 6.2761 | 0.2761 |
| Se | 72 | 6.2755 | 0.2755 |
| Se | 73 | 6.315  | 0.315  |
| Se | 74 | 6.3155 | 0.3155 |
| Se | 75 | 6.2949 | 0.2949 |
| Se | 76 | 6.2942 | 0.2942 |
| Se | 77 | 6.3666 | 0.3666 |
| Se | 78 | 6.3667 | 0.3667 |
| Se | 79 | 6.2756 | 0.2756 |
| Se | 80 | 6.2757 | 0.2757 |
| Se | 81 | 6.3145 | 0.3145 |
| Se | 82 | 6.3151 | 0.3151 |
| Se | 83 | 6.2949 | 0.2949 |
| Se | 84 | 6.2948 | 0.2948 |
| Se | 85 | 6.3667 | 0.3667 |
| Se | 86 | 6.3664 | 0.3664 |
| Se | 87 | 6.2757 | 0.2757 |
| Se | 88 | 6.2759 | 0.2759 |
| Se | 89 | 6.315  | 0.315  |
| Se | 90 | 6.3158 | 0.3158 |
| Se | 91 | 6.295  | 0.295  |
| Se | 92 | 6.2948 | 0.2948 |
| Se | 93 | 6.3669 | 0.3669 |
| Se | 94 | 6.3673 | 0.3673 |
| Se | 95 | 6.2757 | 0.2757 |
| Se | 96 | 6.2758 | 0.2758 |

**Table S5.** Bader charge analysis of FeCo LDH.

| Element | Atom number | Quantity of charge | Change of charges |
|---------|-------------|--------------------|-------------------|
|         |             | (e)                | (e)               |
| Fe      | 1           | 6.5693             | -1.4307           |
| Fe      | 2           | 6.5983             | -1.4017           |
| Fe      | 3           | 6.5885             | -1.4115           |
| Fe      | 4           | 6.7321             | -1.2679           |
| Fe      | 5           | 6.724              | -1.276            |
| Fe      | 6           | 6.5805             | -1.4195           |
| Fe      | 7           | 6.57               | -1.43             |
| Fe      | 8           | 6.7337             | -1.2663           |
| O       | 9           | 7.2511             | 1.2511            |
| O       | 10          | 7.2398             | 1.2398            |
| O       | 11          | 7.2636             | 1.2636            |
| O       | 12          | 7.2256             | 1.2256            |
| O       | 13          | 7.2241             | 1.2241            |



|   |    |        |         |
|---|----|--------|---------|
| O | 14 | 7.2346 | 1.2346  |
| O | 15 | 7.2211 | 1.2211  |
| O | 16 | 7.3137 | 1.3137  |
| O | 17 | 7.294  | 1.294   |
| O | 18 | 7.1764 | 1.1764  |
| O | 19 | 7.1452 | 1.1452  |
| O | 20 | 7.2877 | 1.2877  |
| O | 21 | 7.1791 | 1.1791  |
| O | 22 | 7.2017 | 1.2017  |
| O | 23 | 7.324  | 1.324   |
| O | 24 | 7.1519 | 1.1519  |
| O | 25 | 7.228  | 1.228   |
| O | 26 | 7.216  | 1.216   |
| O | 27 | 7.2337 | 1.2337  |
| O | 28 | 7.2151 | 1.2151  |
| O | 29 | 7.1979 | 1.1979  |
| O | 30 | 7.2157 | 1.2157  |
| O | 31 | 7.1552 | 1.1552  |
| O | 32 | 7.283  | 1.283   |
| O | 33 | 7.1755 | 1.1755  |
| O | 34 | 7.3151 | 1.3151  |
| O | 35 | 7.1467 | 1.1467  |
| O | 36 | 7.2626 | 1.2626  |
| O | 37 | 7.1939 | 1.1939  |
| O | 38 | 7.1723 | 1.1723  |
| O | 39 | 7.2538 | 1.2538  |
| O | 40 | 7.2161 | 1.2161  |
| H | 41 | 0.4093 | -0.5907 |
| H | 42 | 0.4432 | -0.5568 |
| H | 43 | 0.4107 | -0.5893 |
| H | 44 | 0.4297 | -0.5703 |
| H | 45 | 0.3826 | -0.6174 |
| H | 46 | 0.3873 | -0.6127 |
| H | 47 | 0.4324 | -0.5676 |
| H | 48 | 0.3446 | -0.6554 |
| H | 49 | 0.3849 | -0.6151 |
| H | 50 | 0.4337 | -0.5663 |
| H | 51 | 0.4498 | -0.5502 |
| H | 52 | 0.3701 | -0.6299 |
| H | 53 | 0.4371 | -0.5629 |
| H | 54 | 0.4114 | -0.5886 |
| H | 55 | 0.3471 | -0.6529 |
| H | 56 | 0.4493 | -0.5507 |
| H | 57 | 0.3786 | -0.6214 |
| H | 58 | 0.4052 | -0.5948 |
| H | 59 | 0.4394 | -0.5606 |
| H | 60 | 0.3846 | -0.6154 |
| H | 61 | 0.4136 | -0.5864 |
| H | 62 | 0.4125 | -0.5875 |

|    |    |        |         |
|----|----|--------|---------|
| H  | 63 | 0.444  | -0.556  |
| H  | 64 | 0.3809 | -0.6191 |
| H  | 65 | 0.4462 | -0.5538 |
| H  | 66 | 0.3453 | -0.6547 |
| H  | 67 | 0.4496 | -0.5504 |
| H  | 68 | 0.3944 | -0.6056 |
| H  | 69 | 0.4239 | -0.5761 |
| H  | 70 | 0.442  | -0.558  |
| H  | 71 | 0.419  | -0.581  |
| H  | 72 | 0.3821 | -0.6179 |
| Co | 73 | 7.8346 | -1.1654 |
| Co | 74 | 7.8373 | -1.1627 |
| Co | 75 | 7.8208 | -1.1792 |
| Co | 76 | 7.8151 | -1.1849 |
| Co | 77 | 7.8251 | -1.1749 |
| Co | 78 | 7.8285 | -1.1715 |
| Co | 79 | 7.8238 | -1.1762 |
| Co | 80 | 7.8195 | -1.1805 |

**Table S6.** Bader charge analysis of FeCo LDH/NiSe.

| Element | Atom number | Quantity of charge | Change of charges |
|---------|-------------|--------------------|-------------------|
|         |             | (e)                | (e)               |
| Ni      | 1           | 9.7615             | -0.2385           |
| Ni      | 2           | 9.7646             | -0.2354           |
| Ni      | 3           | 9.6498             | -0.3502           |
| Ni      | 4           | 9.6543             | -0.3457           |
| Ni      | 5           | 9.7114             | -0.2886           |
| Ni      | 6           | 9.7191             | -0.2809           |
| Ni      | 7           | 9.7299             | -0.2701           |
| Ni      | 8           | 9.7347             | -0.2653           |
| Ni      | 9           | 9.7652             | -0.2348           |
| Ni      | 10          | 9.7649             | -0.2351           |
| Ni      | 11          | 9.6511             | -0.3489           |
| Ni      | 12          | 9.6497             | -0.3503           |
| Ni      | 13          | 9.7156             | -0.2844           |
| Ni      | 14          | 9.714              | -0.286            |
| Ni      | 15          | 9.7096             | -0.2904           |
| Ni      | 16          | 9.7112             | -0.2888           |
| Ni      | 17          | 9.7624             | -0.2376           |
| Ni      | 18          | 9.7641             | -0.2359           |
| Ni      | 19          | 9.6493             | -0.3507           |
| Ni      | 20          | 9.6539             | -0.3461           |
| Ni      | 21          | 9.7125             | -0.2875           |
| Ni      | 22          | 9.718              | -0.282            |
| Ni      | 23          | 9.7308             | -0.2692           |
| Ni      | 24          | 9.7357             | -0.2643           |
| Ni      | 25          | 9.7654             | -0.2346           |
| Ni      | 26          | 9.7644             | -0.2356           |

|    |    |        |         |
|----|----|--------|---------|
| Ni | 27 | 9.65   | -0.35   |
| Ni | 28 | 9.6499 | -0.3501 |
| Ni | 29 | 9.7156 | -0.2844 |
| Ni | 30 | 9.7144 | -0.2856 |
| Ni | 31 | 9.7095 | -0.2905 |
| Ni | 32 | 9.7098 | -0.2902 |
| Se | 33 | 6.3188 | 0.3188  |
| Se | 34 | 6.3193 | 0.3193  |
| Se | 35 | 6.4002 | 0.4002  |
| Se | 36 | 6.4044 | 0.4044  |
| Se | 37 | 6.3427 | 0.3427  |
| Se | 38 | 6.3402 | 0.3402  |
| Se | 39 | 6.3331 | 0.3331  |
| Se | 40 | 6.3191 | 0.3191  |
| Se | 41 | 6.3153 | 0.3153  |
| Se | 42 | 6.3211 | 0.3211  |
| Se | 43 | 6.405  | 0.405   |
| Se | 44 | 6.3929 | 0.3929  |
| Se | 45 | 6.3492 | 0.3492  |
| Se | 46 | 6.3426 | 0.3426  |
| Se | 47 | 6.3396 | 0.3396  |
| Se | 48 | 6.3509 | 0.3509  |
| Se | 49 | 6.3178 | 0.3178  |
| Se | 50 | 6.3188 | 0.3188  |
| Se | 51 | 6.4007 | 0.4007  |
| Se | 52 | 6.405  | 0.405   |
| Se | 53 | 6.3413 | 0.3413  |
| Se | 54 | 6.341  | 0.341   |
| Se | 55 | 6.3353 | 0.3353  |
| Se | 56 | 6.319  | 0.319   |
| Se | 57 | 6.3146 | 0.3146  |
| Se | 58 | 6.3201 | 0.3201  |
| Se | 59 | 6.4056 | 0.4056  |
| Se | 60 | 6.3925 | 0.3925  |
| Se | 61 | 6.3488 | 0.3488  |
| Se | 62 | 6.3428 | 0.3428  |
| Se | 63 | 6.3402 | 0.3402  |
| Se | 64 | 6.351  | 0.351   |
| Fe | 65 | 6.498  | -1.502  |
| Fe | 66 | 6.4805 | -1.5195 |
| Fe | 67 | 6.5048 | -1.4952 |
| Fe | 68 | 6.5116 | -1.4884 |
| Fe | 69 | 6.4803 | -1.5197 |
| Fe | 70 | 6.5065 | -1.4935 |
| Fe | 71 | 6.4987 | -1.5013 |
| Fe | 72 | 6.4808 | -1.5192 |
| Fe | 73 | 6.5043 | -1.4957 |
| Fe | 74 | 6.5102 | -1.4898 |
| Fe | 75 | 6.4803 | -1.5197 |

|    |     |        |         |
|----|-----|--------|---------|
| Fe | 76  | 6.5063 | -1.4937 |
| O  | 77  | 7.3154 | 1.3154  |
| O  | 78  | 7.2252 | 1.2252  |
| O  | 79  | 7.2834 | 1.2834  |
| O  | 80  | 7.2464 | 1.2464  |
| O  | 81  | 7.2282 | 1.2282  |
| O  | 82  | 7.2951 | 1.2951  |
| O  | 83  | 7.2709 | 1.2709  |
| O  | 84  | 7.2599 | 1.2599  |
| O  | 85  | 7.292  | 1.292   |
| O  | 86  | 7.2601 | 1.2601  |
| O  | 87  | 7.3182 | 1.3182  |
| O  | 88  | 7.2413 | 1.2413  |
| O  | 89  | 7.2638 | 1.2638  |
| O  | 90  | 7.2139 | 1.2139  |
| O  | 91  | 7.291  | 1.291   |
| O  | 92  | 7.2492 | 1.2492  |
| O  | 93  | 7.2647 | 1.2647  |
| O  | 94  | 7.2274 | 1.2274  |
| O  | 95  | 7.2277 | 1.2277  |
| O  | 96  | 7.3093 | 1.3093  |
| O  | 97  | 7.3163 | 1.3163  |
| O  | 98  | 7.2231 | 1.2231  |
| O  | 99  | 7.2882 | 1.2882  |
| O  | 100 | 7.2418 | 1.2418  |
| O  | 101 | 7.2269 | 1.2269  |
| O  | 102 | 7.2951 | 1.2951  |
| O  | 103 | 7.2705 | 1.2705  |
| O  | 104 | 7.2602 | 1.2602  |
| O  | 105 | 7.2917 | 1.2917  |
| O  | 106 | 7.2612 | 1.2612  |
| O  | 107 | 7.3222 | 1.3222  |
| O  | 108 | 7.2417 | 1.2417  |
| O  | 109 | 7.2605 | 1.2605  |
| O  | 110 | 7.2149 | 1.2149  |
| O  | 111 | 7.2913 | 1.2913  |
| O  | 112 | 7.247  | 1.247   |
| O  | 113 | 7.2651 | 1.2651  |
| O  | 114 | 7.2273 | 1.2273  |
| O  | 115 | 7.2251 | 1.2251  |
| O  | 116 | 7.2366 | 1.2366  |
| H  | 117 | 0.3483 | -0.6517 |
| H  | 118 | 0.4162 | -0.5838 |
| H  | 119 | 0.3593 | -0.6407 |
| H  | 120 | 0.3892 | -0.6108 |
| H  | 121 | 0.4301 | -0.5699 |
| H  | 122 | 0.3316 | -0.6684 |
| H  | 123 | 0.3818 | -0.6182 |
| H  | 124 | 0.3679 | -0.6321 |

|    |     |        |         |
|----|-----|--------|---------|
| H  | 125 | 0.3686 | -0.6314 |
| H  | 126 | 0.3852 | -0.6148 |
| H  | 127 | 0.3456 | -0.6544 |
| H  | 128 | 0.4037 | -0.5963 |
| H  | 129 | 0.3925 | -0.6075 |
| H  | 130 | 0.4085 | -0.5915 |
| H  | 131 | 0.3614 | -0.6386 |
| H  | 132 | 0.3933 | -0.6067 |
| H  | 133 | 0.3809 | -0.6191 |
| H  | 134 | 0.4013 | -0.5987 |
| H  | 135 | 0.428  | -0.572  |
| H  | 136 | 0.3469 | -0.6531 |
| H  | 137 | 0.3471 | -0.6529 |
| H  | 138 | 0.4183 | -0.5817 |
| H  | 139 | 0.3571 | -0.6429 |
| H  | 140 | 0.3927 | -0.6073 |
| H  | 141 | 0.4305 | -0.5695 |
| H  | 142 | 0.3322 | -0.6678 |
| H  | 143 | 0.3822 | -0.6178 |
| H  | 144 | 0.3678 | -0.6322 |
| H  | 145 | 0.3684 | -0.6316 |
| H  | 146 | 0.3845 | -0.6155 |
| H  | 147 | 0.3421 | -0.6579 |
| H  | 148 | 0.4031 | -0.5969 |
| H  | 149 | 0.3958 | -0.6042 |
| H  | 150 | 0.4078 | -0.5922 |
| H  | 151 | 0.3617 | -0.6383 |
| H  | 152 | 0.3957 | -0.6043 |
| H  | 153 | 0.3807 | -0.6193 |
| H  | 154 | 0.401  | -0.599  |
| H  | 155 | 0.4311 | -0.5689 |
| H  | 156 | 0.4207 | -0.5793 |
| Co | 157 | 7.7772 | -1.2228 |
| Co | 158 | 7.7734 | -1.2266 |
| Co | 159 | 7.7702 | -1.2298 |
| Co | 160 | 7.7721 | -1.2279 |
| Co | 161 | 7.7779 | -1.2221 |
| Co | 162 | 7.7739 | -1.2261 |
| Co | 163 | 7.7694 | -1.2306 |
| Co | 164 | 7.7717 | -1.2283 |

## References

1. L. Yu, H. Zhou, J. Sun, F. Qin, F. Yu, J. Bao, Y. Yu, S. Chen, Z. Ren, Cu nanowires shelled with NiFe layered double hydroxide nanosheets as bifunctional electrocatalysts for overall water splitting, *Energy Environ. Sci.*, 2017, **10**, 1820-1827.
2. H. Zhou, F. Yu, Q. Zhu, J. Sun, F. Qin, L. Yu, J. Bao, Y. Yu, S. Chen, Z. Ren, Water splitting by electrolysis at high current densities under 1.6 volts, *Energy Environ. Sci.*, 2018, **11**, 2858-2864.
3. Q. Wen, K. Yang, D. Huang, G. Cheng, X. Ai, Y. Liu, J. Fang, H. Li, L. Yu, T. Zhai, Schottky Heterojunction Nanosheet Array Achieving High-Current-Density Oxygen Evolution for Industrial Water Splitting Electrolyzers, *Adv. Energy Mater.*, 2021, **11**, 2102353.
4. J. Liu, W. Du, S. Guo, J. Pan, J. Hu, X. Xu, Iron-Locked Hydr(oxy)oxide Catalysts via Ion-Compensatory Reconstruction Boost Large-Current-Density Water Oxidation, *Adv. Sci.*, 2023, **10**, e2300717.
5. X. Cheng, Z. Pan, C. Lei, Y. Jin, B. Yang, Z. Li, X. Zhang, L. Lei, C. Yuan, Y. Hou, A strongly coupled 3D ternary Fe<sub>2</sub>O<sub>3</sub>@Ni<sub>2</sub>P/Ni(PO<sub>3</sub>)<sub>2</sub> hybrid for enhanced electrocatalytic oxygen evolution at ultra-high current densities, *J. Mater. Chem. A*, 2019, **7**, 965-971.
6. F. Yu, H. Zhou, Y. Huang, J. Sun, F. Qin, J. Bao, W.A. Goddard, S. Chen, Z. Ren, High-performance bifunctional porous non-noble metal phosphide catalyst for overall water splitting, *Nat. Commun.*, 2018, **9**, 2551.
7. X. Y. Zhang, F. T. Li, Y. W. Dong, B. Dong, F. N. Dai, C. G. Liu, Y. M. Chai, Dynamic anion regulation to construct S-doped FeOOH realizing 1000 mA cm<sup>-2</sup>-level-current-density oxygen evolution over 1000 h, *Appl. Catal. B: Environ.*, 2022, **315**, 121571.
8. G. Deng, J. Zhao, H. S. Hu, X. Y. Wang, M. Zhu, Y. Y. Feng, FeOOH-CoS composite catalyst with high catalytic performances for oxygen evolution reaction at high current density, *Int. J. Hydrogen Energy*, 2021, **46**, 37333-37339.
9. X. Zhang, H. Yi, M. Jin, Q. Lian, Y. Huang, Z. Ai, R. Huang, Z. Zuo, C. Tang, A. Amini, F. Jia, S. Song, C. Cheng, In Situ Reconstructed Zn doped Fe<sub>(x)</sub>Ni<sub>(1-x)</sub>OOH Catalyst for Efficient and Ultrastable Oxygen Evolution Reaction at High Current Densities, *Small*, 2022, **18**, e2203710.
10. R. Andaveh, A. Sabour Rouhaghdam, J. Ai, M. Maleki, K. Wang, A. Seif, G. Barati Darband, J. Li, Boosting the electrocatalytic activity of NiSe by introducing MnCo as an efficient heterostructured electrocatalyst for large-current-density alkaline seawater splitting, *Appl. Catal. B: Environ.*, 2023, **325**, 122355.
11. Q. N. Bian, B. S. Guo, D. X. Tan, D. Zhang, W. Q. Kong, C. B. Wang, Y. Y. Feng, Constructing CoNi-LDH/Fe MOF/NF Heterostructure Catalyst for Energy-Efficient OER and UOR at High Current Density, *ACS Appl. Mater. Interfaces*, 2024, **16**, 14742-14749.
12. G. Qian, J. Chen, T. Yu, J. Liu, L. Luo, S. Yin, Three-Phase Heterojunction NiMo-Based Nano-Needle for Water Splitting at Industrial Alkaline Condition, *Nanomicro. Lett.*, 2021, **14**, 20.

13. G. Qian, J. Chen, T. Yu, L. Luo, S. Yin, N-Doped Graphene-Decorated NiCo Alloy Coupled with Mesoporous NiCoMoO Nano-sheet Heterojunction for Enhanced Water Electrolysis Activity at High Current Density, *Nanomicro. Lett.*, 2021, **13**, 77.
14. X. Y. Wang, M. Zhu, Q. N. Bian, B. S. Guo, W. Q. Kong, C. B. Wang, Y. Y. Feng, Fe-Based Metal–Organic Framework-Ni<sub>3</sub>S<sub>2</sub> Heterostructure Nanocomposites for Efficient Oxygen Evolution Reaction at High Current Densities, *ACS Appl. Nano Mater.*, 2023, **6**, 5200-5210.
15. Y. Qian, F. Zhang, L. Qiu, W. Han, Z. Zeng, L. Lei, Y. He, P. Li, X. Zhang, Optimizing electronic structure of NiFe LDH with Mn-doping and Fe<sub>0.64</sub>Ni<sub>0.36</sub> alloy for alkaline water oxidation under industrial current density, *Nano Res.*, 2023, **16**, 8953-8960.
16. X. Mu, X. Gu, S. Dai, J. Chen, Y. Cui, Q. Chen, M. Yu, C. Chen, S. Liu, S. Mu, Breaking the symmetry of single-atom catalysts enables an extremely low energy barrier and high stability for large-current-density water splitting, *Energy Environ. Sci.*, 2022, **1**, 4048-4057.
17. L. Wu, L. Yu, F. Zhang, B. McElhenny, D. Luo, A. Karim, S. Chen, Z. Ren, Heterogeneous Bimetallic Phosphide Ni<sub>2</sub>P-Fe<sub>2</sub>P as an Efficient Bifunctional Catalyst for Water/Seawater Splitting, *Adv. Funct. Mater.*, 2020, **31**, 2006484.
18. S. Niu, W. J. Jiang, Z. Wei, T. Tang, J. Ma, J. S. Hu and L. J. Wan, Se-Doping Activates FeOOH for Cost-Effective and Efficient Electrochemical Water Oxidation, *J. Am. Chem. Soc.*, 2019, **141**, 7005-7013.
19. X. Cheng, Z. Pan, C. Lei, Y. Jin, B. Yang, Z. Li, X. Zhang, L. Lei, C. Yuan and Y. Hou, A strongly coupled 3D ternary Fe<sub>2</sub>O<sub>3</sub>@Ni<sub>2</sub>P/Ni(PO<sub>3</sub>)<sub>2</sub> hybrid for enhanced electrocatalytic oxygen evolution at ultra-high current densities, *J. Mater. Chem. A*, 2019, **7**, 965-971.
20. X. Luo, P. Ji, P. Wang, R. Cheng, D. Chen, C. Lin, J. Zhang, J. He, Z. Shi, N. Li, S. Xiao and S. Mu, Interface Engineering of Hierarchical Branched Mo-Doped Ni<sub>3</sub>S<sub>2</sub>/Ni<sub>x</sub>P<sub>y</sub> Hollow Heterostructure Nanorods for Efficient Overall Water Splitting, *Adv. Energy Mater.*, 2020, **10**, 1903891.
21. J. Li, Z. Yuan, Y. Zhu, D. Li, W. Han, L. Li and G. Li, Engineering multiphasic heterostructure NiCoP@Co<sub>0.5</sub>Ni<sub>0.5</sub>Se<sub>2</sub> with optimized electronic structure enabling robust hydrogen evolution, *Chem. Eng. J.*, 2022, **450**, 138426.
22. Z. Zou, X. Wang, J. Huang, Z. Wu and F. Gao, An Fe-doped nickel selenide nanorod/nanosheet hierarchical array for efficient overall water splitting, *J. Mater. Chem. A*, 2019, **7**, 2233-2241.
23. L. Ji, J. Wang, X. Teng, T. J. Meyer and Z. Chen, CoP Nanoframes as Bifunctional Electrocatalysts for Efficient Overall Water Splitting, *ACS Catal.*, 2019, **10**, 412-419.
24. H. Fan, D. Jiao, J. Fan, D. Wang, B. Zaman, W. Zhang, L. Zhang, W. Zheng and X. Cui, Kinetically and thermodynamically expediting elementary steps via high-valence Cr-incorporated of nickel selenide for water electrolysis, *Nano Res.*, 2023, **17**, 1199-1208.
25. W. Y. Fu, Y. X. Lin, M. S. Wang, S. Si, L. Wei, X. S. Zhao and Y. S. Wei,

- Sepaktakraw-like catalyst Mn-doped CoP enabling ultrastable electrocatalytic oxygen evolution at  $100 \text{ mA}\cdot\text{cm}^{-2}$  in alkali media, *Rare Metals*, 2022, **41**, 3069-3077.
26. Y. Luo, P. Wang, S. Wu, G. Zhang, S. Sun, H. Ranganathan and Z. Shi, Simultaneous heterostructure engineering and Mn doping modulation of  $\text{Ni}_2\text{P}$  nanosheet arrays for enhanced electrocatalytic water splitting, *Sci. China Mater.*, 2022, **65**, 1814-1824.
27. X. Shan, J. Liu, H. Mu, Y. Xiao, B. Mei, W. Liu, G. Lin, Z. Jiang, L. Wen and L. Jiang, An Engineered Superhydrophilic/Superaerophobic Electrocatalyst Composed of the Supported  $\text{CoMoS}_x$  Chalcogel for Overall Water Splitting, *Angew. Chem. Int. Ed.*, 2020, **59**, 1659-1665.
